# Supplementary material for: Anticancer and Antimicrobial Activity of Some New 2,3-Dihydro-1,5-benzodiazepine Derivatives
Source: Hindawi journal article supplement (doi:10.1155/2023/3390122), 2023-11-06
Supplement: f1 [file 3390122.f1.docx]

**Supplementary information**

**Anti-cancer and antimicrobial activity of some new 2,3-dihydro-1,5-benzodiazepine derivatives**

Felix Odame1*, Tatenda Madanhire3 Clement Tettey2, David Neglo1, Francisca Adzaho2 Eric C. Hosten3

1Department of Basic Sciences, University of Health and Allied Sciences, PMB 31, Ho, Ghana

2Department of Biomedical Sciences, University of Health and Allied Sciences, PMB 31, Ho, Ghana

3Department of Chemistry, Nelson Mandela University, P.O. Box 77000, Gqeberha 6031, South Africa


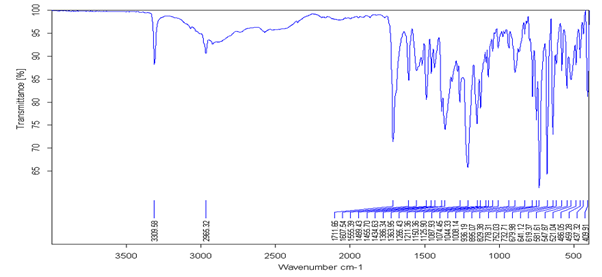


**Figure S1** IR Spectrum of 2,2,4-trimethyl-2,3-dihydro-1,5-benzodiazepine (**1**)

**Figure S2** 13C NMR Spectrum of 2,2,4-trimethyl-2,3-dihydro-1,5-benzodiazepine (**1)**

**Figure S3** DEPT Spectrum of 2,2,4-trimethyl-2,3-dihydro-1,5-benzodiazepine (**1)**


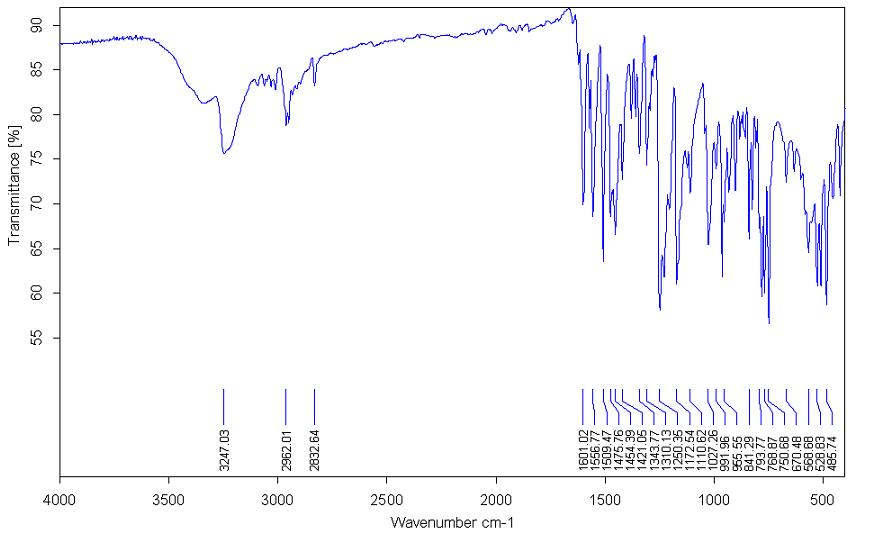


**Figure S4** IR spectrum of (*E*)-4-(4-methoxystyryl)-2,2-dimethyl-2,3-dihydro-1.5-benzodiazepine (**2)**

**Figure S5** 13C NMR spectrum of (*E*)-4-(4-methoxystyryl)-2,2-dimethyl-2,3-dihydro-1,5-benzodiazepine (**2**)

**Figure S6** DEPT of (*E*)-4-(4-methoxystyryl)-2,2-dimethyl-2,3-dihydro-1.5-benzodiazepine **(2**)


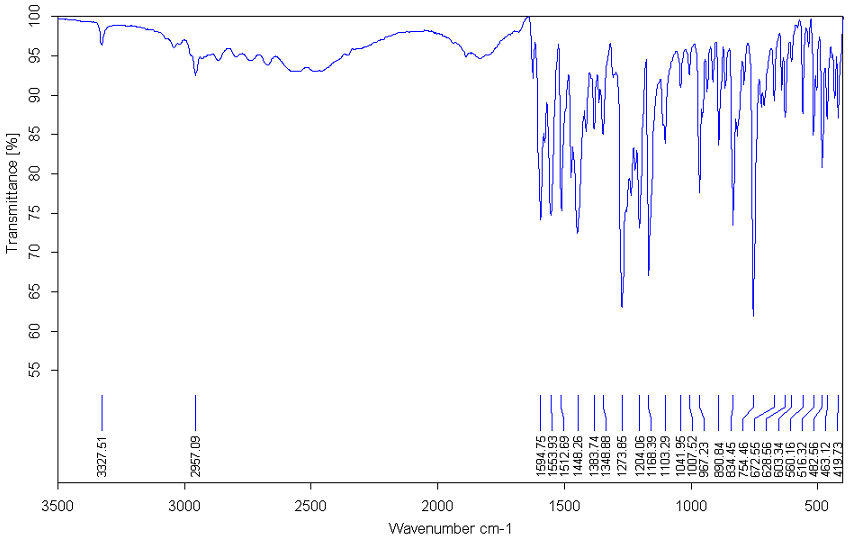


**Figure S7** IR spectrum of (*E*)-4-(2-(2,2-dimethyl-2,3-dihydro-1,5-benzodiazepin-4-yl)vinyl)phenol **(3**)

**Figure S8** 1H NMR spectrum of (*E*)-4-(2-(2,2-dimethyl-2,3-dihydro-1.5-benzodiazepin-4-yl)vinyl)phenol **(3**)

**Figure S9** 13C NMR spectrum of (E)-4-(2-(2,2-dimethyl-2,3-dihydro-1.5-benzodiazepin-4-yl)vinyl)phenol (**3**)

**Figure S10** DEPT spectrum of (*E*)-4-(2-(2,2-dimethyl-2,3-dihydro-1,5-benzodiazepin-4-yl)vinyl)phenol **(3**)


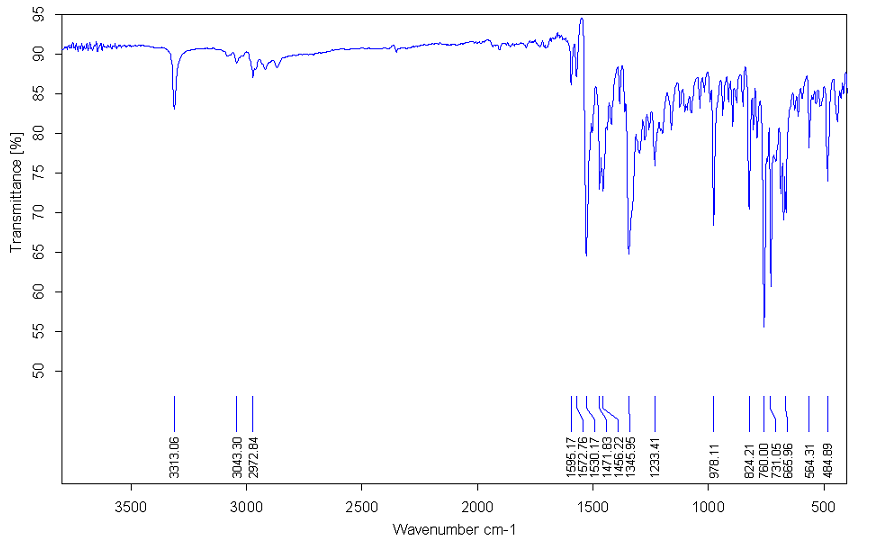


**Figure S11** IR spectrum of E)-2,2-dimethyl-4-(3-nitrostyryl)-2,3-dihydro-1,5-benzodiazepine (**4**)

**Figure S12** 1H NMR spectrum of (*E*)-2,2-dimethyl-4-(3-nitrostyryl)-2,3-dihydro-1,5-benzodiazepine (**4**)

**Figure S13** 13C NMR spectrum of (*E*)-2,2-dimethyl-4-(3-nitrostyryl)-2,3-dihydro-1,5-benzodiazepine (**4**)

**Figure S14** DEPT spectrum of (*E*)-2,2-dimethyl-4-(3-nitrostyryl)-2,3-dihydro-1,5-benzodiazepine (**4**)


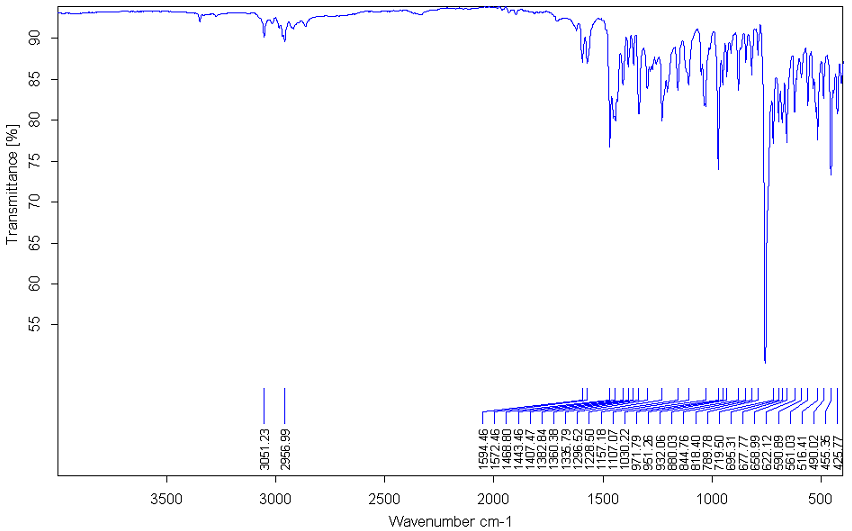


**Figure S15** IR spectrum of (*E*)-4-(2-chlorostyryl)-2,2-dimethyl-2,3-dihydro-1,5-benzodiazepine **(5)**

**Figure S16** 1H NMR spectrum of (*E*)-4-(2-chlorostyryl)-2,2-dimethyl-2,3-dihydro-1,5-benzodiazepine (**5**)

**Figure S17** 13C NMR spectrum of (*E*)-4-(2-chlorostyryl)-2,2-dimethyl-2,3-dihydro-1,5-benzodiazepine (**5**)

**Figure S18** DEPT Spectrum of (E)-4-(2-chlorostyryl)-2,2-dimethyl-2,3-dihydro-1,5-benzodiazepine (**5**)


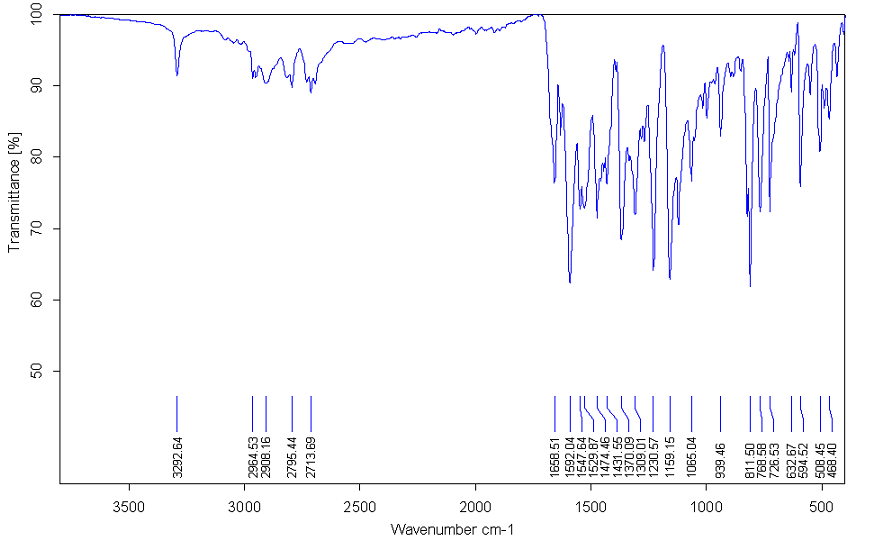


**Figure S19** IR Spectrum of (*E*)-4-(2-(2,2-dimethyl-2,3-dihydro-1,5-benzodiazepin-4-yl)vinyl)-*N,N*-diethylaniline (**6**)

**Figure S20** 1H NMR spectrum of (*E*)-4-(2-(2,2-dimethyl-2,3-dihydro-1,5-benzodiazepin-4-yl)vinyl)-*N,N*-diethylaniline (**6**)

**Figure S21** 13C NMR Spectrum of (*E*)-4-(2-(2,2-dimethyl-2,3-dihydro-1,5-benzodiazepin-4-yl)vinyl)-*N,N*-diethylaniline (**6**)

**Figure S22** DEPT Spectrum of (*E*)-4-(2-(2,2-dimethyl-2,3-dihydro-1,5-benzodiazepin-4-yl)vinyl)-*N*,*N*-diethylaniline(**6**)


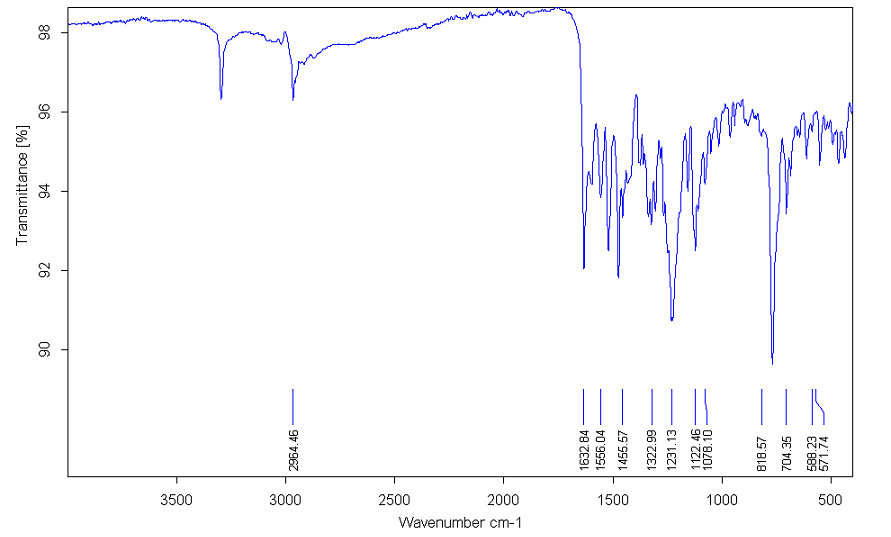


**Figure S23** IR Spectrum of (*E*)-5-(diethylamino)-2-(2-(2,2-dimethyl-2,3-dihydro-1,5-benzodiazepin-4-yl)vinyl) phenol (**7**)

**Figure S24** 1H-NMR Spectrum of (*E*)-5-(diethylamino)-2-(2-(2,2-dimethyl-2,3-dihydro-1,5-benzodiazepin-4-yl)vinyl) phenol (**7**)

**Figure S25** 13C-NMR Spectrum (*E*)-5-(diethylamino)-2-(2-(2,2-dimethyl-2,3-dihydro-1,5-benzodiazepin-4-yl)vinyl) phenol (**7**)

**Figure S26** DEPT Spectrum (*E*)-5-(diethylamino)-2-(2-(2,2-dimethyl-2,3-dihydro-1,5-benzodiazepin-4-yl)vinyl) phenol (**7**)


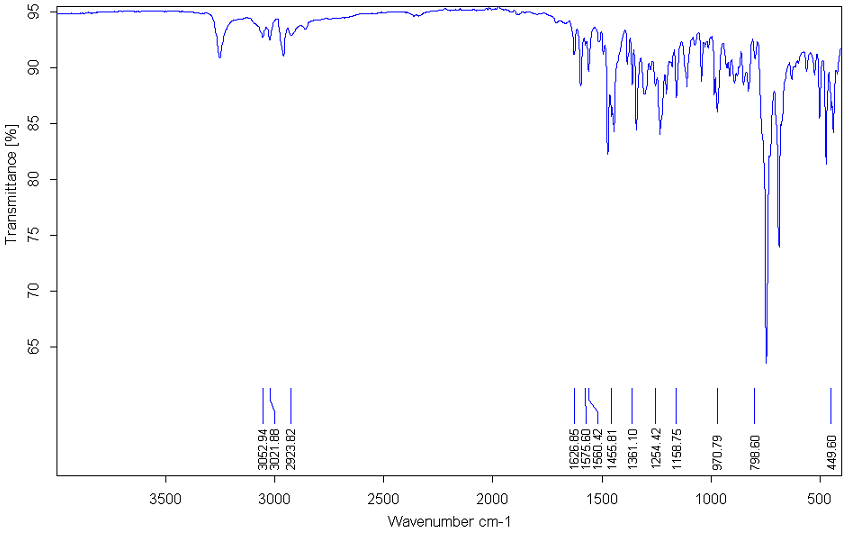
 **Figure S27** IR Spectrum (*E*)-2,2-dimethyl-4-styryl-2,3-dihydro-1,5-benzodiazepine (**8**)

**Figure S28** 1H NMR Spectrum of (*E*)-2,2-dimethyl-4-styryl-2,3-dihydro-1,5-benzodiazepine (**8**)

**Figure S29** 13C NMR Spectrum of (*E*)-2,2-dimethyl-4-styryl-2,3-dihydro-1,5-benzodiazepine (**8**)

**Figure S30** DEPT Spectrum of (*E*)-2,2-dimethyl-4-styryl-2,3-dihydro-1,5-benzodiazepine (**8**)


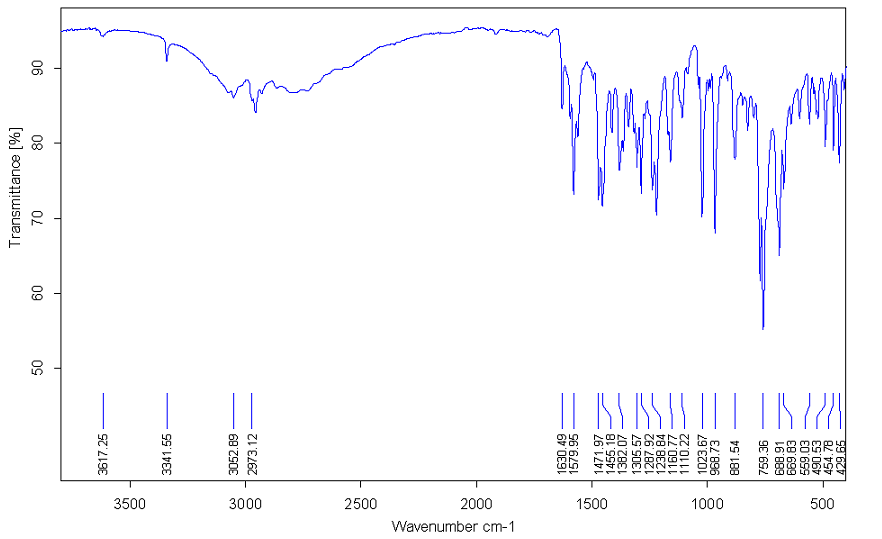


**Figure S31** IR spectrum of (*E*)-3-(2-(2,2-dimethyl-2,3-dihydro-1,5-benzodiazepin-4-yl)vinyl)phenol **(9)**

**Figure S32** 1H NMR spectrum of (*E*)-3-(2-(2,2-dimethyl-2,3-dihydro-1,5-benzodiazepin-4-yl)vinyl)phenol (**9**)

**Figure S33** 13C NMR spectrum of (*E*)-3-(2-(2,2-dimethyl-2,3-dihydro-1,5-benzodiazepin-4-yl)vinyl)phenol (**9**)

**Figure S34** DEPT spectrum of (*E*)-3-(2-(2,2-dimethyl-2,3-dihydro-1,5*-*benzodiazepin-4-yl)vinyl)phenol(**9**)

**Figure S35** GC-MS spectrum of 2,2,4-trimethyl-2,3-dihydro-1,5-benzodiazepine (**1**)

**Figure S36** GC-MS spectrum of (*E*)-4-(4-methoxystyryl)-2,2-dimethyl-2,3-dihydro-1,5-benzodiazepine **(2)**

**Figure S37** GC-MS spectrum of (*E*)-4-(2-(2,2-dimethyl-2,3-dihydro-1,5-benzodiazepin-4-yl)vinyl)phenol **(3)**

**Figure S38** GC-MS spectrum of (*E*)-4-(2-chlorostyryl)-2,2-dimethyl-2,3-dihydro-1,5-benzodiazepine **(5)**

**Figure S39** GC-MS spectrum of (E)-5-(diethylamino)-2-(2-(2,2-dimethyl-2,3-dihydro-1,5-benzodiazepin-4-yl)vinyl) phenol **(7)**

**Figure S40** GC-MS spectrum of (*E*)-2,2-dimethyl-4-styryl-2,3-dihydro-1,5-benzodiazepine **(8)**

**Figure S41** GC-MS spectrum of ()-3-(2-(2,2-dimethyl-2,3-dihydro-1,5-benzodiazepin-4-yl)vinyl)phenol **(9)**


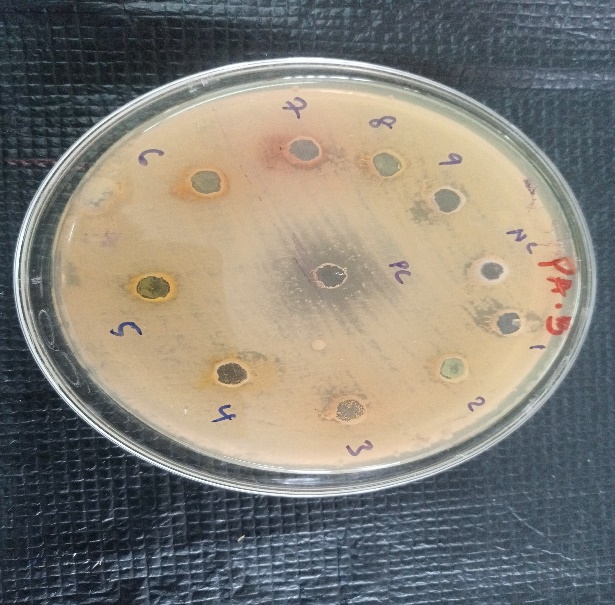

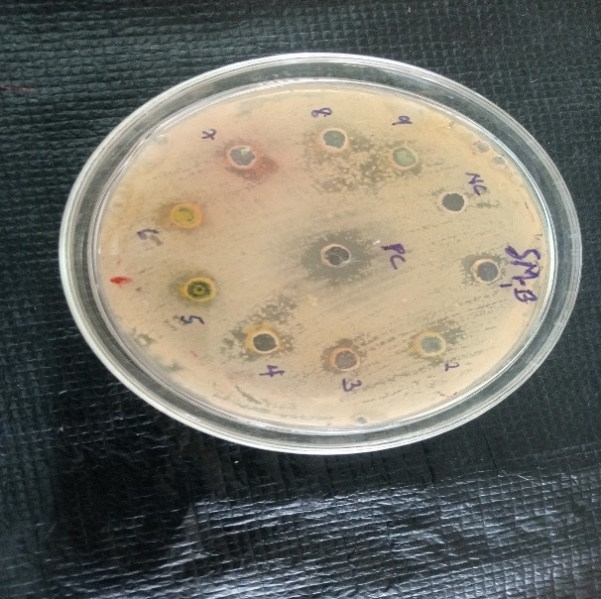


**Figure S42** Results of Benzodiazepines against *P. aeruginosa* and *S. mutans.* (*B-* Benzodiazepines PC- Positive control (Tetracycline) NC- Negative control (methanol))


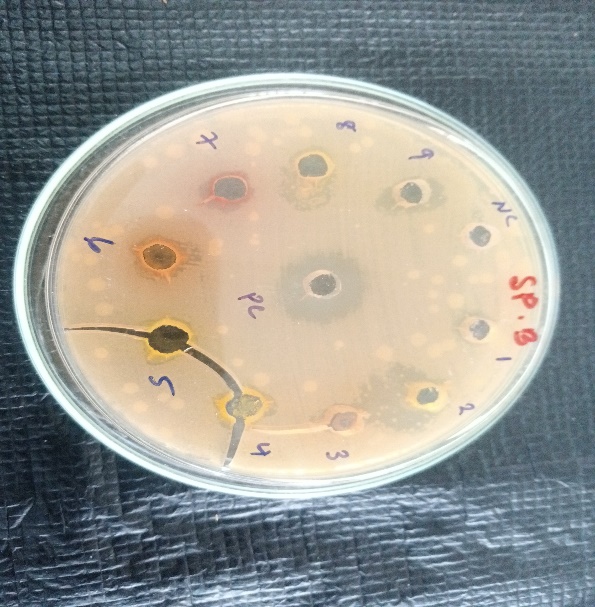

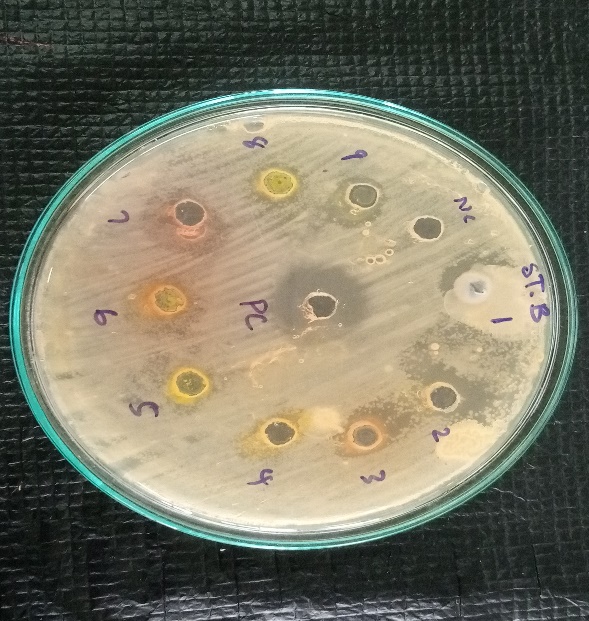


**Figure S43** Results of Benzodiazepines against *S. pyrogens* and *S. typhii.* (B-BenzodiazepinesPC- Positive control (Tetracycline) NC- Negative control (methanol))


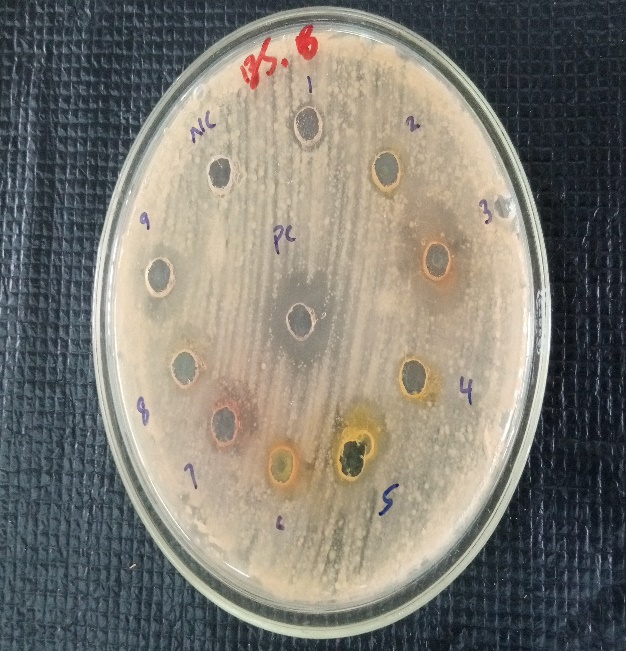

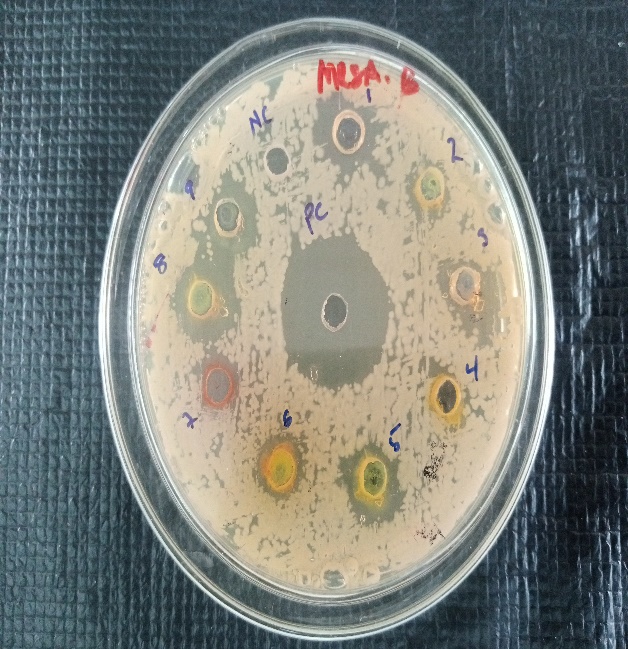


**Figure S44** Results of Benzodiazepines against *B. subtilis and MRSA* (B-Benzodiazepines PC- Positive control (Tetracycline) NC- Negative control (methanol))


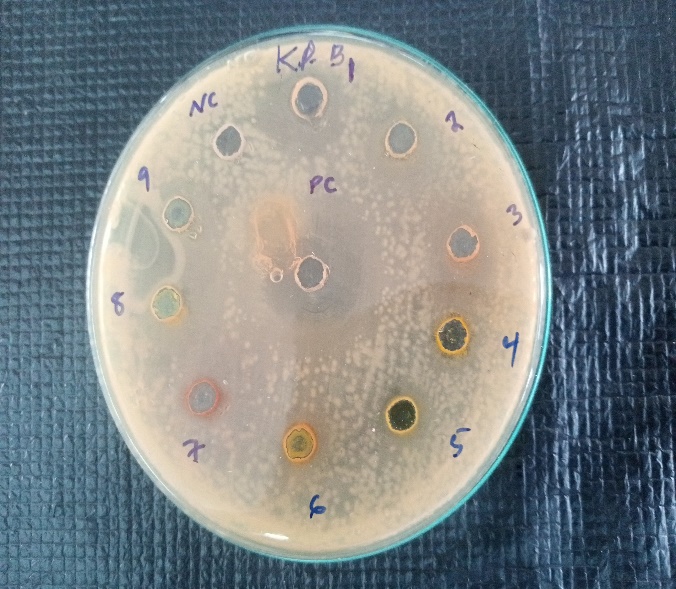

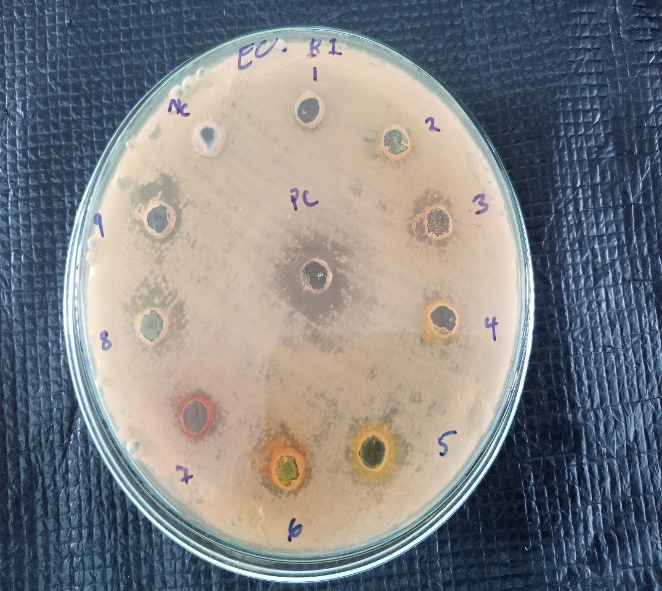


**Figure S45**Results of Benzodiazepines against *K. pneumonia and E. Coli.* (B-Benzodiazepines PC- Positive control (Tetracycline) NC- Negative control (methanol))


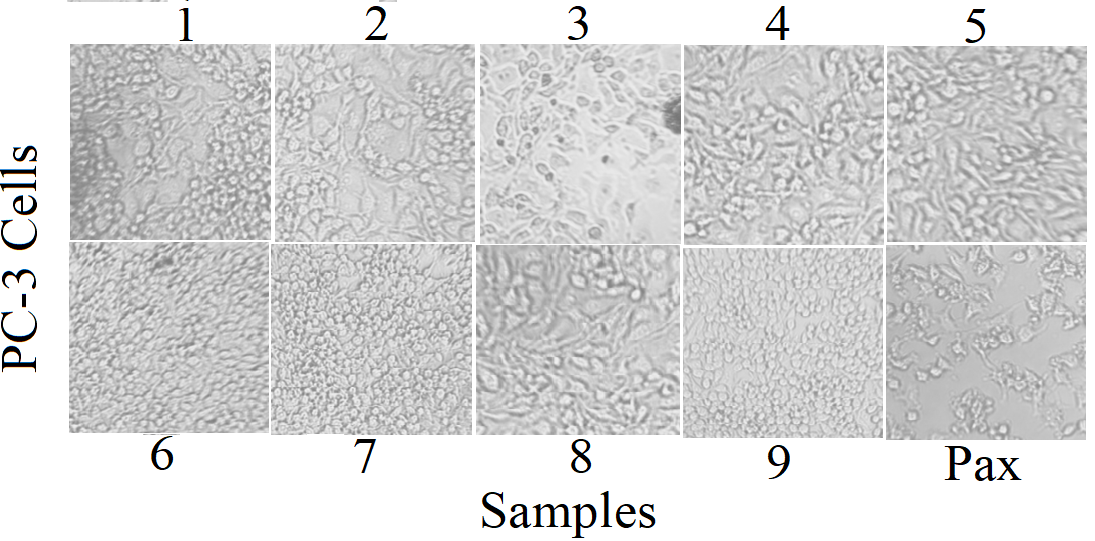


**Figure S46** Pictorial view of the PC-3 cells after expose to compounds.

**Table S1.** Spectral IR band frequencies (cm-1) of compounds **1**–**9**.

| **Compound** | ***ν*(N-H)** | ***ν*(C–H)** | ***ν*(C=N)** | ***ν*(C=C)** | ***ν*(C–N)** |
| --- | --- | --- | --- | --- | --- |
| **1** | 3309 | 2966 | 1607 | 1555 | 1434 |
| **2** | 3247 | 2926; 2833 | 1601 | 1557; 1509 | 1476; 1454 |
| **3** | 3313 | 3043; 2973 |  | 1595 | 1472; 1456 |
| **4** | 3313 | 3043; 2973 |  | 1595; 1573 | 1472; 1456 |
| **5** |  | 3051; 2957 |  | 1594; 1572 | 1469; 1443 |
| **6** | 3293 | 2965; 2908 | 1659 | 1592; 1548 | 1474; 1432 |
| **7** |  | 3052; 2848 |  | 1587 | 1472; 1448 |
| **8** | 3053 | 3022; 2924 | 1627 | 1576; 1560 | 1456 |
| **9** | 3342 | 3053; 2973 | 1630 | 1580 | 1472; 1456 |

**Table S2** Minimum Inhibitory Concentrations of the Test Antibiotics

|  | **MICS of Antibiotics** |  |  |
| --- | --- | --- | --- |
| Text Organism | *Ciprofloxacin* | Ampicillin | *Tetracycline* |
| *E. coli (ATCC 25922)* | 0.98 | 250.0 | 7.81 |
| *K.pneumoniae(NCTC13440)* | 125.0 | 1000.0 | 7.81 |
| *MRSA (NCTC 12493)* | 62.5 | 250.0 | 15.63 |
| *S. mutans (ATCC 700610)* | 125.0 | 1000.0 | 31.25 |
| *B. subtilis (ATCC 10004)*  *S. pyrogens (clinical)* | 125.0  31.25 | 1000.0  1000.0 | 31.25  125.0 |
| *S. typhi (Clinical)* | 1.96 | 1000.0 | 1.96 |
| *P. aeruginosa (ATCC 4853)* | 125.0 | 1000.0 | 31.25 |

**Table S3** Synergistic activity of compound **1** (**B1**) with antibiotics against *bacterial* strains

| Strain | FIC.AMP+B1) | I. | FIC(CIP+B1) | I | FIC(TET+B1) | I |  | B1[MIC(MBC)/R] | | |
| --- | --- | --- | --- | --- | --- | --- | --- | --- | --- | --- |
| EC | 1.00 | AD | 128.05 | A | 16.50 | A |  |  |  | 0.50 (1.00)/ 2bc  0.50 (1.00)/ 2bc  0.50 (0.50)/ 1bc  1.00 (2.00)/ 2bc  1.00 (2.00)/ 2bc  1.00(1.00)/ 1bc  0.50 (2.00)/ 4bc  1.00 (1.00)/ 1bc |
| KP | 0.63 | PS | 1.50 | I | 16.50 | A |  |  |  |
| MRS | 1.00 | AD | 1.50 | I | 8.50 | A |  |  |  |
| SM | 0.63 | PS | 1.50 | I | 2.50 | I |  |  |  |
| BS | 0.63 | PS | 1.50 | I | 2.50 | I |  |  |  |
| SP | 0.63 | PS | 1.50 | I | 1.50 | I |  |  |  |
| ST | 0.63 | PS | 1.50 | I | 64.28 | A |  |  |  |
| PA | 0.63 | PS | 64.28 | A | 1.50 | I |  |  |  |

AMP: Ampicillin; CIP: Ciprofloxacin; TET: Tetracycline I: Interpretation, FICI: Fractional Inhibitory

**Table S4.** Synergistic activity of compound **2** (**B2**) with antibiotics against *bacterial* strains

| Strain | FIC.AMP+B2) | I. | FIC(CIP+B2) | I | FIC(TET+B2) | I |  | B2 [MIC(MBC)/R] | | |
| --- | --- | --- | --- | --- | --- | --- | --- | --- | --- | --- |
| EC | 0.75 | PS | 16.25 | A | 16.25 | A |  |  |  | 0.10(0.10)/1bc  0.50(1.00)/2bc  0.50(1.00)/ 2bc  0.50(2.00)/4bc  0.50(1.00)/2bc  0.50(0.50)/1bc  0.50(1.00)/2bc  0.50(0.50)/1bc |
| KP | 0.75 | PS | 0.38 | S | 16.5 | A |  |  |  |
| MRS | 1.00 | AD | 0.63 | PS | 4.50 | A |  |  |  |
| SM | 0.75 | PS | 0.38 | S | 4.50 | A |  |  |  |
| BS | 0.75 | PS | 0.38 | S | 4.50 | A |  |  |  |
| SP | 0.75 | PS | 1.00 | AD | 4.50 | A |  |  |  |
| ST | 0.75 | PS | I6.07 | A | 4.50 | A |  |  |  |
| PA | 0.75 | PS | 0.38 | S | 2.50 | I |  |  |  |

AMP: Ampicillin; CIP: Ciprofloxacin; TET: Tetracycline I: Interpretation, FICI: Fractional Inhibitory

**Table S5.** Synergistic activity of compound **3** (**B3**) with antibiotics against *bacterial* strains

| Strain | FIC.AMP+B3) | I. | FIC(CIP+B3) | I | FIC(TET+B3) | I |  | B3[MIC(MBC)/R] | | |
| --- | --- | --- | --- | --- | --- | --- | --- | --- | --- | --- |
| EC | 1.00 | AD | 64.78 | A | 16.50 | A |  |  |  | 1.0(1.0)/1bc  1.0(2.0)/2bc  1.0(4.0)/4bc  1.0(1.0)1bc  0.5(1.0)2bc  0.5(0.5)/1bc  0.5(0.5)/1bc  0.5(0.5)/1bc |
| KP | 0.75 | PS | 0.31 | S | 4.25 | A |  |  |  |
| MRS | 1.00 | AD | 0.50 | S | 4.50 | A |  |  |  |
| SM | 0.75 | PS | 0.75 | PS | 2.50 | ND |  |  |  |
| BS | 0.75 | PS | 1.25 | ND | 1.50 | ND |  |  |  |
| SP | 0.75 | PS | 0.37 | S | 0.62 | PS |  |  |  |
| ST | 0.75 | PS | 16.00 | A | 2.50 | ND |  |  |  |
| PA | 0.75 | PS | 0.37 | S | 16.06 | A |  |  |  |

AMP: Ampicillin; CIP: Ciprofloxacin; TET: Tetracycline I: Interpretation, FICI: Fractional Inhibitory

**Table S6.** Synergistic activity of compound **4** (**B4**) with antibiotics against bacterial strains

| Strain | FIC.AMP+B4) | I. | FIC(CIP+B4) | I | FIC(TET+B4) | I |  | B4 [MIC(MBC)/R] | | |
| --- | --- | --- | --- | --- | --- | --- | --- | --- | --- | --- |
| EC | 1.00 | AD | 128.05 | A | 16.51 | A |  |  |  | 1.0(2.0)/2bc  2.0(2.0)/1bc  0.25(2.0)/4bc  0.125(1.0)/8bs  2.0(2.0)/1bc  1.0(1.0)/1bc  1.0(1.0)/1bc  1.0(1.0)/1bc |
| KP | 1.50 | ND | 0.75 | PS | 1.50 | ND |  |  |  |
| MRS | 0.75 | PS | 0.63 | PS | 8.50 | A |  |  |  |
| SM | 0.75 | PS | 1.00 | AD | 4.50 | A |  |  |  |
| BS | 0.75 | PS | 1.00 | AD | 4.50 | A |  |  |  |
| SP | 0.75 | PS | 2.50 | ND | 1.13 | ND |  |  |  |
| ST | 0.75 | PS | 16.03 | A | 64.28 | A |  |  |  |
| PA | 0.75 | PS | 0.38 | S | 8.50 | A |  |  |  |

AMP: Ampicillin; CIP: Ciprofloxacin; TET: Tetracycline I: Interpretation, FICI: Fractional Inhibitory

**Table S7.** Synergistic activity of compound **5** (**B5**) with antibiotics against *bacterial* strains

| Strain | FIC.AMP+B5) | I. | FIC(CIP+B5) | I | FIC(TET+B5) | I |  | B5[MIC(MBC)/R] | | |
| --- | --- | --- | --- | --- | --- | --- | --- | --- | --- | --- |
| EC | 1.00 | AD | 31.96 | A | 16.50 | A |  |  |  | 2.0(2.0)/1bc  2.0(4.0)/2bc  1.0(2.0)/2bc  2.0(2.0)/1bc  2.0(4.0)/2bc  2.0(2.0)/1bc  2.0(4.0)/2.bc  2.0(2.0)/1bc |
| KP | 0.75 | PS | 0.31 | S | 16.50 | A |  |  |  |
| MRS | 1.00 | AD | 0.57 | PS | 8.50 | A |  |  |  |
| SM | 0.75 | PS | 0.31 | 512 | 4.50 | A |  |  |  |
| BS | 0.75 | PS | 0.75 | 512 | 4.50 | A |  |  |  |
| SP | 0.75 | PS | 0.75 | 512 | 4.50 | A |  |  |  |
| ST | 0.75 | PS | 16.00 | 512 | 1.50 | ND |  |  |  |
| PA | 0.75 | PS | 1.00 | 512 | 2.50 | ND |  |  |  |

AMP: Ampicillin; CIP: Ciprofloxacin; TET: Tetracycline I: Interpretation, FICI: Fractional Inhibitory

**Table S8.** Synergistic activity of compound **6** (**B6**) with antibiotics against *bacterial* strains

| Strain | FIC.AMP+B6) | I. | FIC(CIP+B6) | I | FIC(TET+B6) | I |  | B6 [MIC(MBC)/R] | | |
| --- | --- | --- | --- | --- | --- | --- | --- | --- | --- | --- |
| EC | 1.00 | AD | 31.96 | A | 16.50 | A |  |  |  | 1.0(2.0)/2bc  1.0(1.0)/1bc  1.0(1.0)/1bc  1.0(2.0)/2bc  1.0(1.0)/1bc  1.0(8.0)/8bs  1.0(1.0)1bc  1.0(8.0)/8bs |
| KP | 0.75 | PS | 0.31 | S | 16.50 | A |  |  |  |
| MRS | 1.00 | AD | 0.57 | PS | 8.50 | A |  |  |  |
| SM | 0.75 | PS | 0.31 | S | 4.50 | A |  |  |  |
| BS | 0.75 | PS | 0.75 | PS | 4.50 | A |  |  |  |
| SP | 0.75 | PS | 0.75 | PS | 4.50 | A |  |  |  |
| ST | 0.75 | PS | 0.75 | PS | 1.50 | ND |  |  |  |
| PA | 0.75 | PS | 1.00 | AD | 2.50 | ND |  |  |  |

AMP: Ampicillin; CIP: Ciprofloxacin; TET: Tetracycline I: Interpretation, FICI: Fractional Inhibitory

**Table S9** Synergistic activity of compound **7** (**B7**) with antibiotics against *bacterial* strains

| Strain | FIC.AMP+B7) | I. | FIC(CIP+B7) | I | FIC(TET+B7) | I |  | B7[MIC(MBC)/R] | | |
| --- | --- | --- | --- | --- | --- | --- | --- | --- | --- | --- |
| EC | 1.00 | AD | 31.92 | A | 16.24 | A |  |  |  | 0.25(1.0)/4bc  0.5(1.0)/2bc  0.5(0.5)/1bc  0.25(1.0)/4bc  0.5(1.0)/2bc  1.0(1.0)/1bc  0.5(1.0)/2bc  0.5(1.0)/2bc |
| KP | 0.75 | PS | 0.75 | PS | 16.50 | A |  |  |  |
| MRS | 0.31 | S | 1.00 | AD | 8.50 | A |  |  |  |
| SM | 0.65 | PS | 0.37 | S | 4.52 | A |  |  |  |
| BS | 0.63 | PS | 1.50 | ND | 4.50 | A |  |  |  |
| SP | 0.63 | PS | 1.00 | AD | 1.50 | ND |  |  |  |
| ST | 0.75 | PS | 16.44 | A | 64.28 | A |  |  |  |
| PA | 0.63 | PS | 0.37 | S | 4.50 | A |  |  |  |

AMP: Ampicillin; CIP: Ciprofloxacin; TET: Tetracycline I: Interpretation, FICI: Fractional Inhibitory

**Table S10** Synergistic activity of compound **8** (**B8**) with antibiotics against *bacterial* strains

| Strain | FIC.AMP+B8) | I. | FIC(CIP+B8) | I | FIC(TET+B8) | I |  | B8[MIC(MBC)/R] | | |
| --- | --- | --- | --- | --- | --- | --- | --- | --- | --- | --- |
| EC | 1.00 | AD | 31.96 | A | 16.50 | A |  |  |  | 1.0(2.0)/2bc  2.0(2.0)/1bc  1.0(2.0)/2bc  2.0(2.0)/1bc  1.0(4.0)/4bc  1.0(2.0)/2bc  2.0(4.0)/2bc  1.0(2.0)/2bc |
| KP | 0.75 | PS | 0.31 | S | 16.50 | A |  |  |  |
| MRS | 1.00 | AD | 0.57 | PS | 8.50 | A |  |  |  |
| SM | 0.75 | PS | 0.31 | S | 4.50 | A |  |  |  |
| BS | 0.75 | PS | 0.75 | PS | 4.50 | A |  |  |  |
| SP | 0.75 | PS | 0.75 | PS | 4.50 | A |  |  |  |
| ST | 0.75 | PS | 16.00 | A | 1.50 | ND |  |  |  |
| PA | 0.75 | PS | 1.00 | AD | 2.50 | ND |  |  |  |

AMP: Ampicillin; CIP: Ciprofloxacin; TET: Tetracycline I: Interpretation, FICI: Fractional Inhibitory

**Table S11** Synergistic activity of compound **9** (**B9**) with antibiotics against *bacterial* strains

| Strain | FIC.AMP+B9) | I. | FIC(CIP+B9) | I | FIC(TET+B9) | I |  | B 9[MIC(MBC)/R] | | |
| --- | --- | --- | --- | --- | --- | --- | --- | --- | --- | --- |
| EC | 1.50 | ND | 31.96 | A | 16.50 | A |  |  |  | 2.0(2.0)/1bc  2.0(2.0)/1bc  2.0(8.0)/4bc  4.0(4.0)/1bc  2.0(2.0)/1bc  2.0(2.0)/1bc  2.0(4.0)/2bc  4.0(4.0)/1bc |
| KP | 1.00 | AD | 0.31 | S | 16.50 | A |  |  |  |
| MRS | 0.75 | PS | 0.57 | PS | 8.50 | A |  |  |  |
| SM | 1.00 | AD | 0.31 | S | 4.50 | A |  |  |  |
| BS | 0.75 | PS | 0.75 | PS | 4.50 | A |  |  |  |
| SP | 0.75 | PS | 0.75 | PS | 4.50 | A |  |  |  |
| ST | 0.75 | PS | 16.00 | A | 1.50 | ND |  |  |  |
| PA | 0.75 | PS | 1.00 | AD | 2.50 | ND |  |  |  |

AMP: Ampicillin; CIP: Ciprofloxacin; TET: Tetracycline I: Interpretation, FICI: Fractional Inhibitory

**Table S12** IC50s of the Various Test Benzodiazepines Inhibiting the Pathogenic Biofilm Formation

| **Organisms** | | | | | | | | |
| --- | --- | --- | --- | --- | --- | --- | --- | --- |
| Compounds | EC | KP | MRSA | SM | BS | SP | ST | PA |
| B1 | 0.1±0 | - | 0.48±0.04 | 0.16±0 | 0.42±0.03 | 0.41±0 | 0.12±0.01 | 0.7±0.02 |
| B2 | 0.13±0 | 0.08±0 | 0.2±0.05 | - | 0.25±0.02 | - | 0.72±0.04 | 0.53±0.03 |
| B3 | 0.9±0.01 | 0.24±0.02 | 0.57±0.13 | 0.16±0.04 | 0.41±0.03 | 0.4±0 | 0.12±0.01 | 0.74±0.03 |
| B4 | 0.58±0.01 | 0.15±0.01 | 0.77±0.03 | 0.14±0 | 0.08±0 | 0.4±0 | 0.07±0 | 0.73±0.02 |
| B5 | 0.94±0.01 | 0.37±0.08 | 0.47±0.02 | 0.28±0 | 0.4±0.09 | 0.56±0.01 | 0.46±0.32 | 0.94±0 |
| B6 | 0.28±0.01 | 0.07±0 | - | 0.31±0.03 | 0.09±0 | 0.43±0 | 0.2±0.02 | 0.37±0.01 |
| B7 | 0.18±0.03 | 0.11±0.01 | - | 0.36±0 | 0.11±0 | 0.11±0 | 0.07±0 | 0.5±0.02 |
| B8 | 0.63±0.01 | 0.17±0 | 0.6±0.13 | - | 0.34±0.03 | 0.27±0.01 | 0.5±0 | 0.11±0.01 |
| B9 | 0.7±0.01 | 0.43±0.4 | - | - | 0.08±0.01 | 0.11±0 | 0.13±0.01 | 0.45±0.03 |
| Antibiotics | 0.07±0 | 0.05±0 | 0.04±0 | 0.08±0 | 0.03±0 | 0.02±0 | 0.18±0.02 | 0.07±0 |
